# Supplementary material
Source: MDPI journal article supplement (https://www.mdpi.com/1999-4907/14/3/637)

Supplementary files:

**Supplemental Table S1.** Primer sequences used in this study

| Name                           | Sequence (5'-3')              | Purpose                                       |
|--------------------------------|-------------------------------|-----------------------------------------------|
| <i>CaMV 35S-F</i>              | TCCCCCGGGTGAGACTTTTCAACAAAGGG | promoter cloning and vector construction      |
| <i>CaMV 35S-R</i>              | AAAAGTGCAGTGTCTCTCCAAATGAAATG |                                               |
| <i>RUBY-F</i>                  | ATGGATCATGCGACCCTC            | <i>RUBY</i> PCR/RT-PCR detecting              |
| <i>RUBY-R</i>                  | TCACTATCACTGGAGGCTTG          |                                               |
| <i>CYP76AD1-F</i>              | ATGGATCATGCGACCCTC            | <i>CYP76AD1</i> RT-PCR detecting              |
| <i>CYP76AD1-R</i>              | ATGGATCATGCGACCCTC            |                                               |
| <i>DODA-F</i>                  | GATCCTCACCGTCGAGGATAC         | <i>DODA</i> RT-PCR detecting                  |
| <i>DODA-R</i>                  | GGCGGAGGTGAACTTGTAGG          |                                               |
| <i>glucosyl transferase-F</i>  | ACCGCCATCAAGATGAACAC          | <i>glucosyl transferase</i> RT-PCR detecting  |
| <i>glucosyl transferase-R</i>  | TCACTATCACTGGAGGCTTG          |                                               |
| <i>PvoActin-F</i>              | CCAGAAGTCTTGTTCAGCCATCTC      | <i>PvoActin</i> RT-PCR/RT-qPCR detecting      |
| <i>PvoActin-R</i>              | GCGGTGATCTCCTTGCTCATACG       |                                               |
| <i>AtActin-F</i>               | TGTGCCAATCTACGAGGGTTT         | <i>AtActin</i> RT-PCR/RT-qPCR detecting       |
| <i>AtActin-R</i>               | TTTCCCGCTCTGCTGTTGT           |                                               |
| <i>NbActin-F</i>               | AATGGAACTGGAATGGTCAAGGC       | <i>NbActin</i> RT-PCR/RT-qPCR detecting       |
| <i>NbActin-R</i>               | TGCCAGATCTTCTCCATGTCATCCCA    |                                               |
| <i>CYP76AD1-qF</i>             | TCGCCAAGATTCACGGCC            | <i>CYP76AD1</i> RT-qPCR detecting             |
| <i>CYP76AD1-qR</i>             | TATTCGGGATCGTGCGGTTG          |                                               |
| <i>DODA-qF</i>                 | GATCCTCACCGTCGAGGATAC         | <i>DODA</i> RT-qPCR detecting                 |
| <i>DODA-qR</i>                 | GGCTTCACTGTCTCCAG             |                                               |
| <i>glucosyl transferase-qF</i> | CAGGCCATTTCTCGAACTCG          | <i>glucosyl transferase</i> RT-qPCR detecting |
| <i>Glucosyl transferase-qR</i> | TGCCGCTGGAGGAGTAGG            |                                               |

**Supplemental Figure S1.** Lowly red coloration of *RUBY* transgenic hairy roots of *P. volubilis* induced by *A. rhizogenes* K599

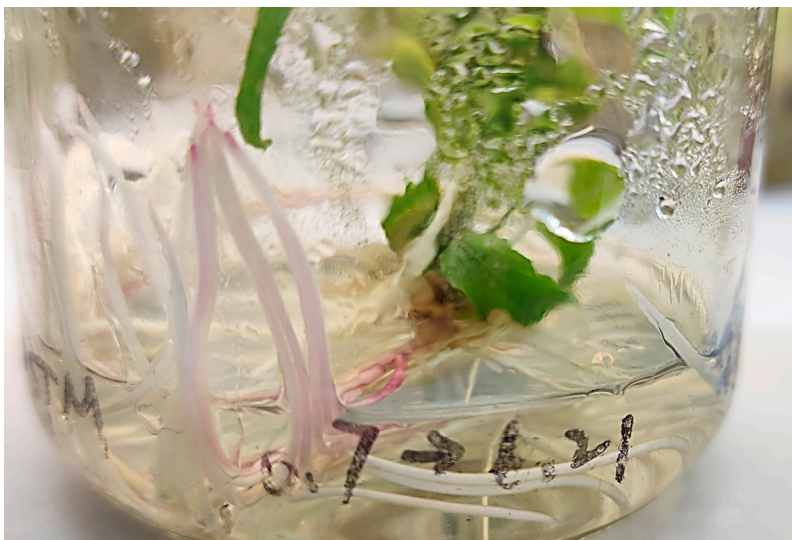

**Supplemental Figure S2.** PCR identification of *RUBY* transgenic *Arabidopsis* lines. M indicates marker 15 000, CK1 indicates negative sample ddH<sub>2</sub>O, CK2 indicates sample pCambia1301 vector plasmid, and CK3 indicates positive sample 35S<sub>346bp</sub>::*RUBY* plasmid

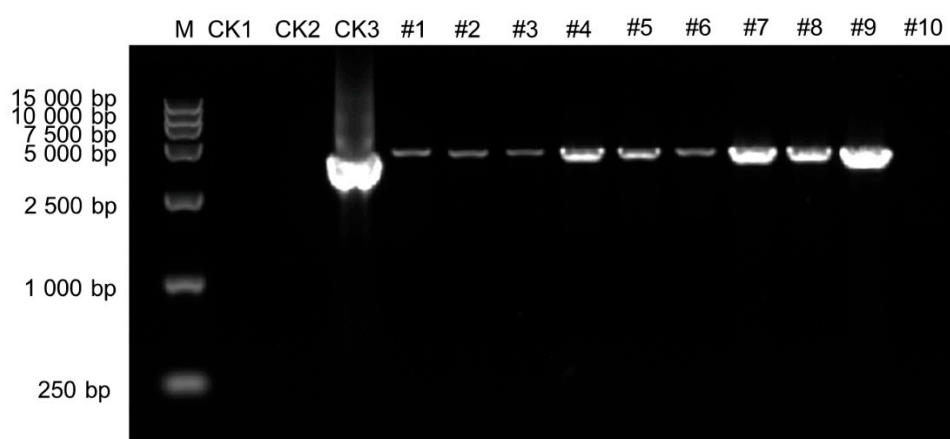

**Supplemental Figure S3.** *RUBY* transgenic shoots of *N. benthamiana* induced by leaf-disk transformation methods

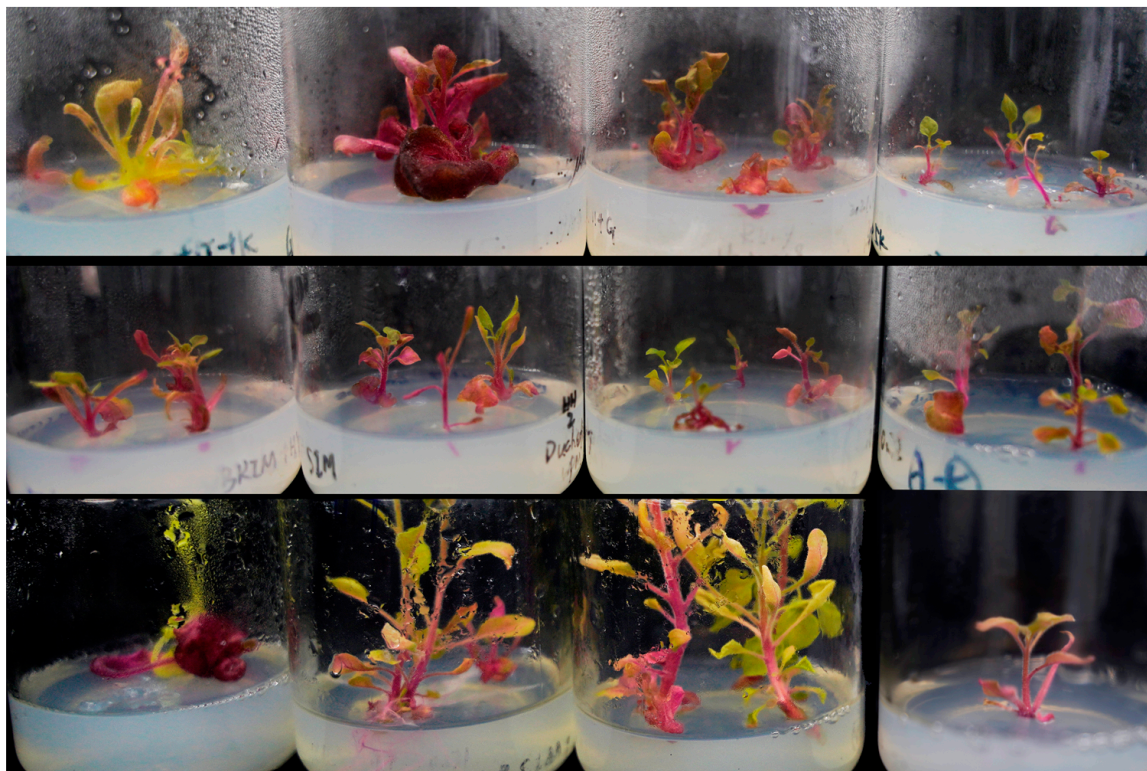

**Supplemental Figure S4.** *RUBY* transgenic *N. benthamiana* plants grown in the pots.

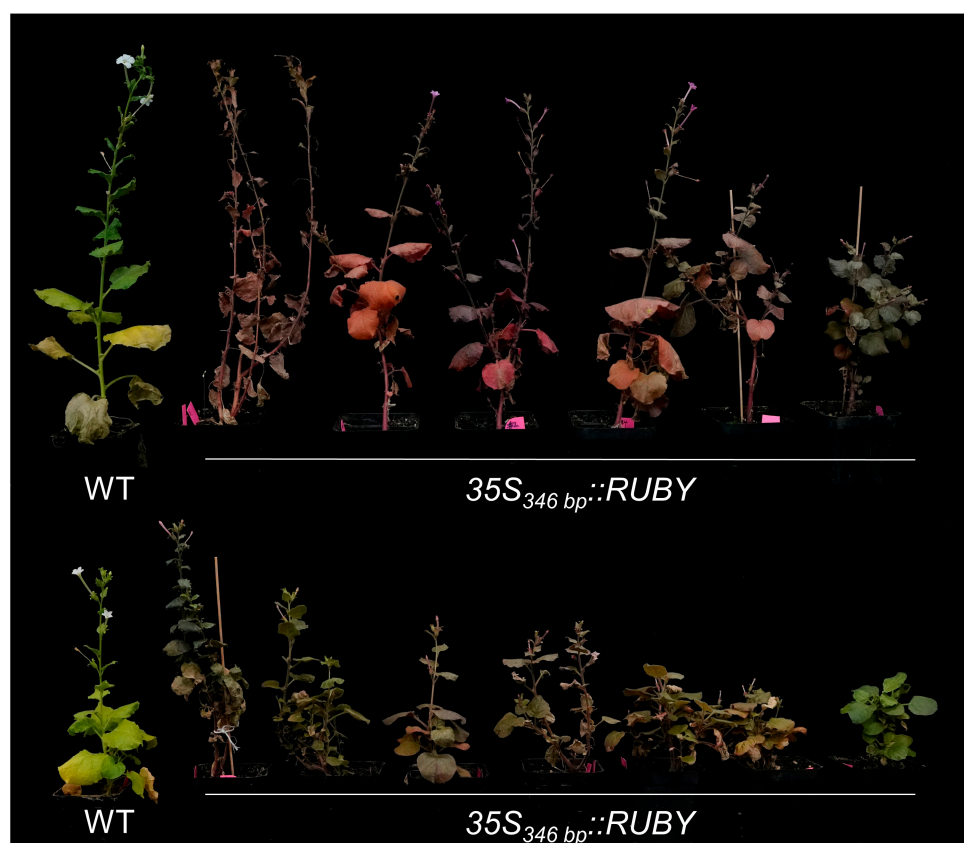

**Supplemental Figure S5.** A non-uniform red coloration of *RUBY* transgenic hairy root of *P. volubilis*. Regions No. 1-3 in this figure are secondary roots that show red coloration throughout, region No. 4 is a partially colored secondary root, region No. 5 is a noncolored primary root, region No. 6 is the noncolored part of the secondary root, and region No. 7 is a noncolored primary root with a colored secondary root (Scale bar = 1 cm).

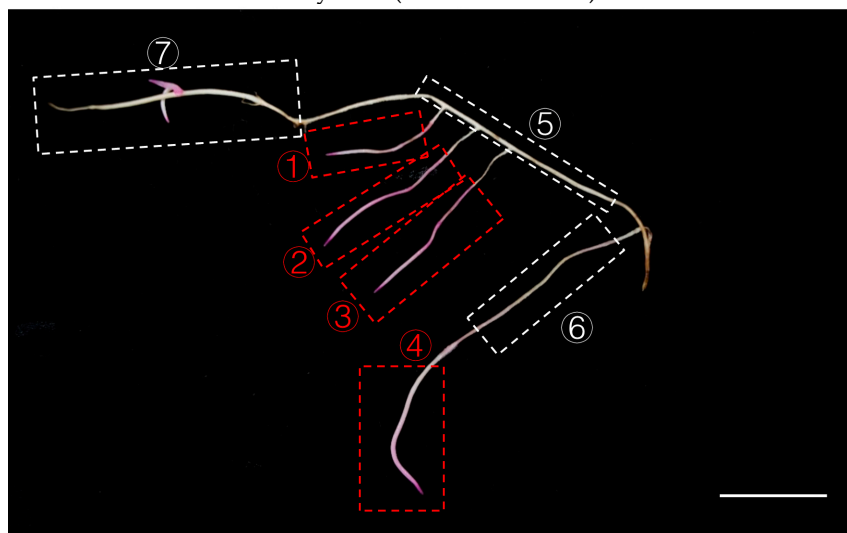

**Supplemental Figure S6.** Characterization of *RUBY* transgenic *Arabidopsis*. (a) Growth of *RUBY* transgenic *Arabidopsis*. “WT” indicates wild-type Columbia-0 *Arabidopsis*. (b) Later growth stage of line #3. (c) Enlarged area of the white rectangle in Figure e, line #3 bearing both red (red arrow) and white inflorescences (yellow arrow).

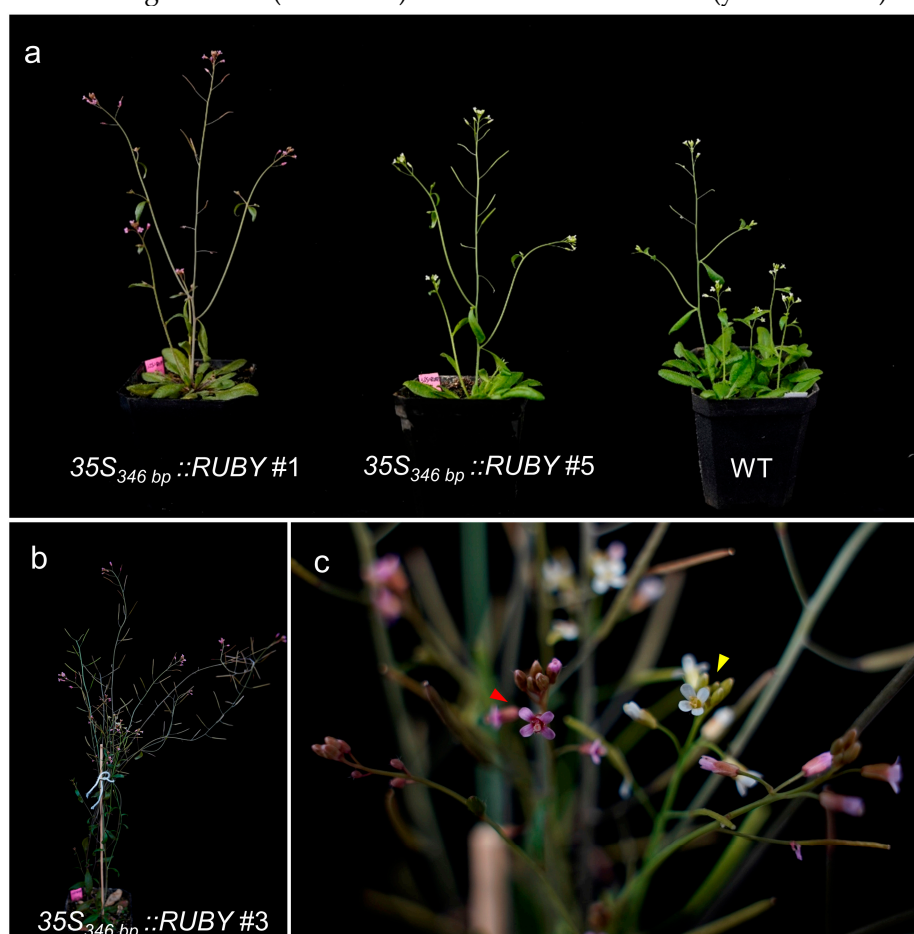

**Supplemental Figure S7.** *RUBY* transgenic *Arabidopsis* offspring screening and red coloration. (a-f) T2 seedlings of lines #1~#6 of *RUBY* transgenic *Arabidopsis* sowed on 1/2 MS medium containing hygromycin for 14 d.

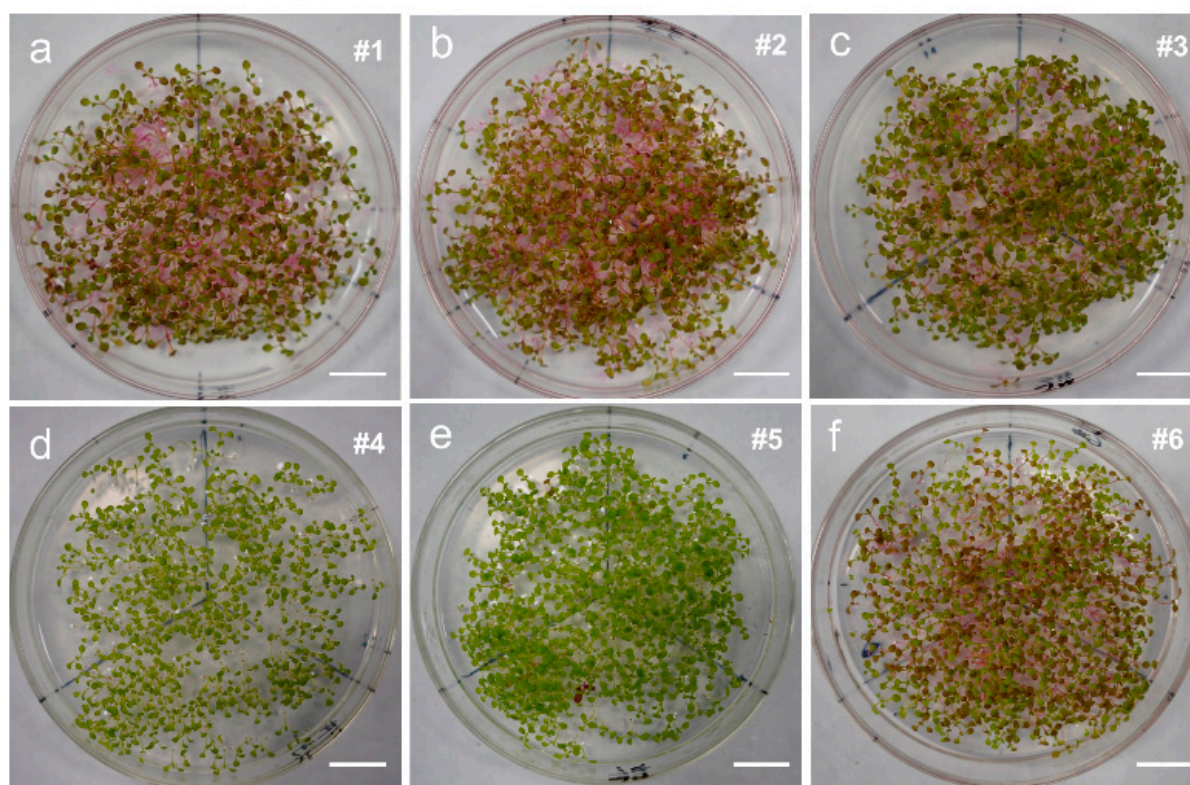

Supplement: s1 [file s1]
